# Supplementary material for: Accelerating silage maize breeding: forage yield and nutritive quality of doubled haploid-derived hybrids
Source: PeerJ. 2025 Oct 17;13:e20197. doi: 10.7717/peerj.20197 (PMC12536795; doi:10.7717/peerj.20197)
Supplement: Supplemental Information 1 — Maize genotypes for forage yield (t ha-1), plant height (cm), ear ratio (%), stem ratio (%), DM (%), CP (%), NDF (%), ADF (%), ADL (%), and RFV parameters. [file peerj-13-20197-s001.xlsx]

## Sheet: 2021
Location	Genotypes	Replications	Plant height	Ear ratio	Stem ratio	Forage yield
Bursa	S1	1	335	33	33	9820
Bursa	S1	2	345	35	32	9250
Bursa	S1	3	345	34	33	9535.7
Bursa	S2	1	340	36	36	9592.9
Bursa	S2	2	325	36	35	9505.7
Bursa	S2	3	330	34	35	9342.9
Bursa	S3	1	300	36	34	7735.7
Bursa	S3	2	290	36	34	7400
Bursa	S3	3	300	35	33	7664.3
Bursa	S4	1	300	35	34	9250
Bursa	S4	2	290	34	35	8473.2
Bursa	S4	3	300	35	34	9077.1
Bursa	S5	1	350	33	25	9650
Bursa	S5	2	335	33	26	9150
Bursa	S5	3	345	34	27	9124.3
Bursa	S6	1	365	38	33	9850
Bursa	S6	2	340	38	32	10034
Bursa	S6	3	360	38	33	10236
Bursa	S7	1	325	35	29	8257.1
Bursa	S7	2	320	35	30	7589.3
Bursa	S7	3	325	36	31	7995.7
Bursa	S8	1	300	37	30	9285.7
Bursa	S8	2	315	35	32	9552.9
Bursa	S8	3	320	36	32	9321.4
Bursa	S9	1	345	34	36	9827.1
Bursa	S9	2	320	34	34	10379
Bursa	S9	3	330	33	35	10086
Bursa	S10	1	290	33	36	9078.6
Bursa	S10	2	325	33	36	9537.1
Bursa	S10	3	305	33	36	9224.3
Bursa	S11	1	335	35	36	10114
Bursa	S11	2	345	35	35	9708.6
Bursa	S11	3	330	35	37	9791.4
Bursa	S12	1	320	34	35	8392.9
Bursa	S12	2	310	34	35	7892.9
Bursa	S12	3	320	35	34	8792.9
Sakarya	S1	1	315	35	33	8457.1
Sakarya	S1	2	310	34	35	8900
Sakarya	S1	3	300	34	36	8278.6
Sakarya	S2	1	330	36	36	9042.9
Sakarya	S2	2	330	36	36	9918.6
Sakarya	S2	3	350	35	38	9800
Sakarya	S3	1	360	37	35	8557.1
Sakarya	S3	2	350	36	33	8971.4
Sakarya	S3	3	360	37	35	10086
Sakarya	S4	1	320	32	33	6914.3
Sakarya	S4	2	315	33	32	7792.9
Sakarya	S4	3	310	34	33	7071.4
Sakarya	S5	1	320	30	30	9435.7
Sakarya	S5	2	340	29	33	9385.7
Sakarya	S5	3	310	28	31	9688.6
Sakarya	S6	1	310	36	30	9902.9
Sakarya	S6	2	315	35	29	10124
Sakarya	S6	3	320	36	31	9557.1
Sakarya	S7	1	320	30	32	8757.1
Sakarya	S7	2	320	28	33	8871.4
Sakarya	S7	3	295	27	33	8385.7
Sakarya	S8	1	310	29	33	6942.9
Sakarya	S8	2	310	30	34	6471.4
Sakarya	S8	3	310	30	34	6157.1
Sakarya	S9	1	330	38	33	9814.3
Sakarya	S9	2	320	38	33	10201
Sakarya	S9	3	340	37	35	10061
Sakarya	S10	1	310	34	36	9345.7
Sakarya	S10	2	290	33	36	9312.9
Sakarya	S10	3	285	34	34	8854.3
Sakarya	S11	1	330	32	35	9814.3
Sakarya	S11	2	340	31	35	9637.1
Sakarya	S11	3	290	33	31	9928.6
Sakarya	S12	1	285	36	34	8928.6
Sakarya	S12	2	315	37	31	9347.1
Sakarya	S12	3	300	36	32	9477.1

## Sheet: 2022
Location	Genotypes	Replications	Plant height	Ear ratio	Stem ratio	Forage yield
Bursa	S1	1	345	38	34	9035.7
Bursa	S1	2	345	37	35	8492.9
Bursa	S1	3	350	36	37	8778.6
Bursa	S2	1	345	36	36	8550
Bursa	S2	2	340	35	34	8500
Bursa	S2	3	335	36	34	8935.7
Bursa	S3	1	310	35	34	8140
Bursa	S3	2	345	35	35	8050
Bursa	S3	3	325	34	35	7950
Bursa	S4	1	320	39	35	7878.6
Bursa	S4	2	320	38	36	7964.3
Bursa	S4	3	310	36	36	7735.7
Bursa	S5	1	325	33	29	8478.6
Bursa	S5	2	350	31	29	7921.4
Bursa	S5	3	340	31	30	8792.9
Bursa	S6	1	380	40	35	9085.7
Bursa	S6	2	380	40	37	8928.6
Bursa	S6	3	375	38	37	9385.7
Bursa	S7	1	350	35	31	8342.9
Bursa	S7	2	345	37	32	6864.3
Bursa	S7	3	355	37	33	7921.4
Bursa	S8	1	340	38	30	9135.7
Bursa	S8	2	345	39	33	9378.6
Bursa	S8	3	350	39	35	9228.6
Bursa	S9	1	360	37	33	9392.9
Bursa	S9	2	370	38	34	8835.7
Bursa	S9	3	375	38	35	9057.1
Bursa	S10	1	369	33	33	8435.7
Bursa	S10	2	368	35	34	7142.9
Bursa	S10	3	367	35	36	8628.6
Bursa	S11	1	355	36	37	9214.3
Bursa	S11	2	360	36	37	8600
Bursa	S11	3	365	35	38	8957.1
Bursa	S12	1	320	33	40	8000
Bursa	S12	2	310	34	38	7864.3
Bursa	S12	3	320	35	38	8500
Sakarya	S1	1	375	38	34	9271.4
Sakarya	S1	2	370	37	35	8685.7
Sakarya	S1	3	370	36	37	9071.4
Sakarya	S2	1	380	35	36	8271.4
Sakarya	S2	2	360	35	34	9000
Sakarya	S2	3	375	36	34	8657.1
Sakarya	S3	1	300	35	34	6942.9
Sakarya	S3	2	310	35	35	7342.9
Sakarya	S3	3	320	35	35	7657.1
Sakarya	S4	1	325	37	35	6942.9
Sakarya	S4	2	310	38	36	7657.1
Sakarya	S4	3	325	38	36	7800
Sakarya	S5	1	350	33	29	8971.4
Sakarya	S5	2	360	32	29	8142.9
Sakarya	S5	3	350	32	30	8707.1
Sakarya	S6	1	390	40	35	9900
Sakarya	S6	2	400	38	37	10242.9
Sakarya	S6	3	400	38	37	10078.6
Sakarya	S7	1	370	35	31	7185.7
Sakarya	S7	2	385	37	32	8700
Sakarya	S7	3	390	37	33	8178.6
Sakarya	S8	1	385	38	30	8714.3
Sakarya	S8	2	350	38	33	8500
Sakarya	S8	3	375	39	35	8921.4
Sakarya	S9	1	380	37	33	9785.7
Sakarya	S9	2	400	37	34	9357.1
Sakarya	S9	3	390	37	35	9692.9
Sakarya	S10	1	385	33	33	7942.9
Sakarya	S10	2	390	34	34	7171.4
Sakarya	S10	3	395	35	36	7950
Sakarya	S11	1	380	36	37	8857.1
Sakarya	S11	2	370	35	37	8471.4
Sakarya	S11	3	380	35	38	8678.6
Sakarya	S12	1	360	33	40	7900
Sakarya	S12	2	335	35	38	8214.3
Sakarya	S12	3	340	35	38	8921.4

## Sheet: Genotypes mean
Genotypes	Replications	Plant height Bursa 2021	Plant heigt Sakarya 2021	Plant height Bursa 2022	Plant heigt Sakarya 2022	Genotype Mean		Genotypes	Replications	Ear Ratio Bursa 2021	Ear Ratio Sakarya 2021	Ear Ratio Bursa 2022	Ear Ratio Sakarya 2022	Genotype Mean		Genotypes	Replications	Stem Ratio Bursa 2021	Stem Ratio Sakarya 2021	Stem Ratio Bursa 2022	Stem Ratio Sakarya 2022	Genotype Mean		Genotypes	Replications	Forage yield Bursa 2021	Forage yield Sakarya 2021	Forage yield Bursa 2022	Forage yield Sakarya 2022	Genotype Mean
S1	1	335	315	345	375	342.5		S1	1	33	35	38	38	36		S1	1	33	33	34	34	33.5		S1	1	9820	8457.1	9035.7	9271.4	9146.05
S1	2	345	310	345	370	342.5		S1	2	35	34	37	37	35.75		S1	2	32	35	35	35	34.25		S1	2	9250	8900	8492.9	8685.7	8832.15
S1	3	345	300	350	370	341.25		S1	3	34	34	36	36	35		S1	3	33	36	37	37	35.75		S1	3	9535.7	8278.6	8778.6	9071.4	8916.08
S2	1	340	330	345	380	348.75		S2	1	36	36	36	35	35.75		S2	1	36	36	36	36	36		S2	1	9592.9	9042.9	8550	8271.4	8864.3
S2	2	325	330	340	360	338.75		S2	2	36	36	35	35	35.5		S2	2	35	36	34	34	34.75		S2	2	9505.7	9918.6	8500	9000	9231.08
S2	3	330	350	335	375	347.5		S2	3	34	35	36	36	35.25		S2	3	35	38	34	34	35.25		S2	3	9342.9	9800	8935.7	8657.1	9183.93
S3	1	300	360	310	300	317.5		S3	1	36	37	35	35	35.75		S3	1	34	35	34	34	34.25		S3	1	7735.7	8557.1	8140	6942.9	7843.92
S3	2	290	350	345	310	323.75		S3	2	36	36	35	35	35.5		S3	2	34	33	35	35	34.25		S3	2	7400	8971.4	8050	7342.9	7941.08
S3	3	300	360	325	320	326.25		S3	3	35	37	34	35	35.25		S3	3	33	35	35	35	34.5		S3	3	7664.3	10086	7950	7657.1	8339.35
S4	1	300	320	320	325	316.25		S4	1	35	32	39	37	35.75		S4	1	34	33	35	35	34.25		S4	1	9250	6914.3	7878.6	6942.9	7746.45
S4	2	290	315	320	310	308.75		S4	2	34	33	38	38	35.75		S4	2	35	32	36	36	34.75		S4	2	8473.2	7792.9	7964.3	7657.1	7971.88
S4	3	300	310	310	325	311.25		S4	3	35	34	36	38	35.75		S4	3	34	33	36	36	34.75		S4	3	9077.1	7071.4	7735.7	7800	7921.05
S5	1	350	320	325	350	336.25		S5	1	33	30	33	33	32.25		S5	1	25	30	29	29	28.25		S5	1	9650	9435.7	8478.6	8971.4	9133.93
S5	2	335	340	350	360	346.25		S5	2	33	29	31	32	31.25		S5	2	26	33	29	29	29.25		S5	2	9150	9385.7	7921.4	8142.9	8650
S5	3	345	310	340	350	336.25		S5	3	34	28	31	32	31.25		S5	3	27	31	30	30	29.5		S5	3	9124.3	9688.6	8792.9	8707.1	9078.23
S6	1	365	310	380	390	361.25		S6	1	38	36	40	40	38.5		S6	1	33	30	35	35	33.25		S6	1	9850	9902.9	9085.7	9900	9684.65
S6	2	340	315	380	400	358.75		S6	2	38	35	40	38	37.75		S6	2	32	29	37	37	33.75		S6	2	10034	10124	8928.6	10242.9	9832.38
S6	3	360	320	375	400	363.75		S6	3	38	36	38	38	37.5		S6	3	33	31	37	37	34.5		S6	3	10236	9557.1	9385.7	10078.6	9814.35
S7	1	325	320	350	370	341.25		S7	1	35	30	35	35	33.75		S7	1	29	32	31	31	30.75		S7	1	8257.1	8757.1	8342.9	7185.7	8135.7
S7	2	320	320	345	385	342.5		S7	2	35	28	37	37	34.25		S7	2	30	33	32	32	31.75		S7	2	7589.3	8871.4	6864.3	8700	8006.25
S7	3	325	295	355	390	341.25		S7	3	36	27	37	37	34.25		S7	3	31	33	33	33	32.5		S7	3	7995.7	8385.7	7921.4	8178.6	8120.35
S8	1	300	310	340	385	333.75		S8	1	37	29	38	38	35.5		S8	1	30	33	30	30	30.75		S8	1	9285.7	6942.9	9135.7	8714.3	8519.65
S8	2	315	310	345	350	330		S8	2	35	30	39	38	35.5		S8	2	32	34	33	33	33		S8	2	9552.9	6471.4	9378.6	8500	8475.73
S8	3	320	310	350	375	338.75		S8	3	36	30	39	39	36		S8	3	32	34	35	35	34		S8	3	9321.4	6157.1	9228.6	8921.4	8407.12
S9	1	345	330	360	380	353.75		S9	1	34	38	37	37	36.5		S9	1	36	33	33	33	33.75		S9	1	9827.1	9814.3	9392.9	9785.7	9705
S9	2	320	320	370	400	352.5		S9	2	34	38	38	37	36.75		S9	2	34	33	34	34	33.75		S9	2	10379	10201	8835.7	9357.1	9693.2
S9	3	330	340	375	390	358.75		S9	3	33	37	38	37	36.25		S9	3	35	35	35	35	35		S9	3	10086	10061	9057.1	9692.9	9724.25
S10	1	290	310	369	385	338.5		S10	1	33	34	33	33	33.25		S10	1	36	36	33	33	34.5		S10	1	9078.6	9345.7	8435.7	7942.9	8700.73
S10	2	325	290	368	390	343.25		S10	2	33	33	35	34	33.75		S10	2	36	36	34	34	35		S10	2	9537.1	9312.9	7142.9	7171.4	8291.08
S10	3	305	285	367	395	338		S10	3	33	34	35	35	34.25		S10	3	36	34	36	36	35.5		S10	3	9224.3	8854.3	8628.6	7950	8664.3
S11	1	335	330	355	380	350		S11	1	35	32	36	36	34.75		S11	1	36	35	37	37	36.25		S11	1	10114	9814.3	9214.3	8857.1	9499.92
S11	2	345	340	360	370	353.75		S11	2	35	31	36	35	34.25		S11	2	35	35	37	37	36		S11	2	9708.6	9637.1	8600	8471.4	9104.27
S11	3	330	290	365	380	341.25		S11	3	35	33	35	35	34.5		S11	3	37	31	38	38	36		S11	3	9791.4	9928.6	8957.1	8678.6	9338.92
S12	1	320	285	320	360	321.25		S12	1	34	36	33	33	34		S12	1	35	34	40	40	37.25		S12	1	8392.9	8928.6	8000	7900	8305.38
S12	2	310	315	310	335	317.5		S12	2	34	37	34	35	35		S12	2	35	31	38	38	35.5		S12	2	7892.9	9347.1	7864.3	8214.3	8329.65
S12	3	320	300	320	340	320		S12	3	35	36	35	35	35.25		S12	3	34	32	38	38	35.5		S12	3	8792.9	9477.1	8500	8921.4	8922.85

## Sheet: Quality values
Genotypes	Replication	Dry matter	Crude protein	NDF	ADF	ADL
S1	1	33.2	8.8	44.1	24.6	2.2
S1	2	33.1	9.2	43.4	24.3	2.5
S1	3	35.4	8.9	44.6	24.2	2.5
S2	1	34.2	9.5	48.8	26.2	2.7
S2	2	32.9	9.2	50.9	26.7	2.8
S2	3	33.5	9.4	50.2	26.3	2.5
S3	1	33.9	9.8	53.5	26.6	2.9
S3	2	31.7	9.4	52.4	25.3	3.3
S3	3	33.3	9.6	55	27.1	2.6
S4	1	32.1	9.5	49.7	26.8	2.8
S4	2	32.2	9.8	49.4	27.2	3.5
S4	3	33.4	9.4	50.6	26.5	2.8
S5	1	33.5	8.6	56.5	27.1	3.1
S5	2	33.2	8.8	55.4	27.3	3.5
S5	3	30.3	8.6	55.7	28.7	3.3
S6	1	36.3	9.7	42.3	25.4	2.4
S6	2	35.4	9.9	41.5	23.5	2.1
S6	3	35.6	9.6	40.6	26.1	2.7
S7	1	34.7	8.7	50.2	26.8	2.4
S7	2	34.6	8.8	49.9	27.1	2.4
S7	3	31	8.8	51.1	28.1	2.1
S8	1	32.5	8.6	48.5	25.1	2.7
S8	2	33.5	9.3	47.2	24.4	2.4
S8	3	34.4	9.2	50.3	26.9	2.4
S9	1	32.5	9.1	45	26.7	2.7
S9	2	32.6	9.2	46.5	26.8	2.8
S9	3	33.7	9.5	46.2	28.1	2.7
S10	1	33.5	9.1	47.5	28.2	3
S10	2	34	9.1	46.6	27.9	2.9
S10	3	33	9	46	27	3
S11	1	32.8	8.5	46.6	28.1	2.1
S11	2	32.9	9.1	43.4	27.2	1.5
S11	3	33	8.8	42.5	27.1	1.9
S12	1	32.5	9	48.6	28	3.5
S12	2	33.4	8.9	50.3	27	2.9
S12	3	33	8.9	49.9	29.3	3.3

## Sheet: Sources of Donor Material
Number	Genotype name	Kernel type	FAO maturity group
1	P.2088	Dent	700
2	FAMOSO	Dent	700
3	DKC-7240	Dent	750
4	DKC-6876	Dent	700
5	DKC-5783	Dent	500
6	DKC-6761	Dent	650
7	TK-6063	Dent	650
8	SABIA	Dent	700
9	P.31A34	Dent	700
10	P.3394	Dent	580
11	KERBANIS	Dent	550
12	DKC-6441	Dent	650
13	P.0729	Dent	550
14	P.1921	Dent	700
15	P.0937	Dent	550
16	P.31Y43	Dent	680
17	DKC-6589	Dent	700
18	KİLOWAT	Dent	700
19	SAMADA-07	Dent	700
20	KONTİGOS	Dent	600
21	P.1241	Dent	650
22	SAKARYA	Dent	700
23	ZP 707	Dent	700
24	ADA-523	Dent	700
25	P.32W86	Dent	550
26	KATONE	Dent	650
27	AGA	Dent	700
28	KERMES	Dent	600
29	HACIBEY	Dent	650
30	P.1574	Dent	700
31	P.3167	Dent	600
32	KOPİAS	Dent	700
